# Supplementary material
Source: HighWire-hosted journal article supplement (https://www.jrheum.org/highwire/filestream/34163/field_highwire_adjunct_files/0/171249DataSuppl.pdf)
Supplement: 171249DataSuppl.pdf [file 171249DataSuppl.pdf]

ONLINE SUPPLEMENTARY DATA

**Supplementary Table 1.** Comparison of radiological features and surgery between included and excluded patients

|         | Patients included (n=17)                                                                                                                                                                                | Patients excluded (n=58)                                                                         |
|---------|---------------------------------------------------------------------------------------------------------------------------------------------------------------------------------------------------------|--------------------------------------------------------------------------------------------------|
| X-Ray   | Pseudarthrosis located at the apex;<br>Severe anterior column defect                                                                                                                                    | Pseudarthrosis located above or below the apex;<br>No obvious destruction of anterior column     |
| CT      | Narrow of the spinal canal caused by extensive lesions                                                                                                                                                  | No involvement of spinal canal                                                                   |
| MRI     | 1. Hypointense signal intensity in T1 and T2 images;<br>2. Decreased spinal canal secondary to anterior extradural tissue or posterior hypertrophic ligamentum flavum;<br>3. Impingement of spinal cord | No spinal canal compression                                                                      |
| Surgery | 1. Anterior debridement;<br>2. PSO through pseudarthrosis and supplemental anterior fusion;<br>3. Decompression around the lesion                                                                       | 1. PSO below the pseudarthrosis;<br>2. No decompression or debridement around the pseudarthrosis |

*PSO: pedicle subtraction osteotomy*

**Supplementary Table 2.** The correlation between MRI and the relevant histological findings.

| <b>MRI manifestation</b>                                                                                                                    | <b>Histological findings</b>                                                                    |
|---------------------------------------------------------------------------------------------------------------------------------------------|-------------------------------------------------------------------------------------------------|
| Low signal intensity change in the disc space in T2-weighted imaging                                                                        | Proliferation of fibrous tissue replace the normal structure                                    |
| Low signal intensity band at the margin of vertebral endplate in T1-weighted imaging                                                        | Sclerotic subchondral bone revealed an unfused spinal segment                                   |
| Widespread low signal intensity region within the vertebral body                                                                            | Cartilaginous degeneration, fibrocartilage formation or fibrinous necrosis caused by due stress |
| Isolated vertebral segment with normal signal intensity in T2-weighted imaging but present with low signal intensity in T1-weighted imaging | Necrotic bone fragments enclosed by fibroblastic tissue                                         |

**Supplementary Table 3.** Histological changes of biologic inflammation.

| <b>Description of inflammatory histological changes</b>                                                  | <b>Proportion of each type of histologic lesion (%)</b> |
|----------------------------------------------------------------------------------------------------------|---------------------------------------------------------|
| Dense fibrous tissue infiltrated by a small amount of plasma cells and lymphocytes                       | 1.8%                                                    |
| Widespread small lymphocytes accompanied by hemosiderin                                                  | 3.6%                                                    |
| Fibrillary fibrosis with scanty mononuclear inflammatory cells                                           | 5.4%                                                    |
| Breaching and erosions of vertebral endplate by non-specific granulation tissue growing from bone marrow | 1.8%                                                    |
